# Supplementary material
Source: MDPI journal article supplement (https://www.mdpi.com/2075-163X/12/3/360)
Supplement: s1 [file s1]

## Supplementary Materials

# An Integrated Capture of Red Mud and One-Step Heat-Treatment Process to Recover Platinum Group Metals and Prepare Glass-Ceramics from Spent Auto-Catalysts

Chuan Liu <sup>1,2</sup>, Shuchen Sun <sup>1,2,\*</sup>, Ganfeng Tu <sup>1,2</sup> and Faxin Xiao <sup>1,2</sup>

<sup>1</sup> School of Metallurgy, Northeastern University, Shenyang 110819, China; neuliuchuan@outlook.com (C.L.); tugf@smm.neu.edu.cn (G.T.); xiaofx@smm.neu.edu.cn (F.X.)

<sup>2</sup> Key Laboratory for Recycling of Nonferrous Metal Resources (Shenyang), Shenyang 110819, China

\* Correspondence: sunsc@smm.neu.edu.cn; Tel.: +86-024-836-89195

**Table S1** Relationship between partial molar volume of different oxides and temperature.

| Oxides                         | Partial molar volume (cm <sup>3</sup> /mol) | References |
|--------------------------------|---------------------------------------------|------------|
| SiO <sub>2</sub>               | $27.516 \times (1 + \frac{T-1773}{10000})$  | [1,2]      |
| CaO                            | $20.7 \times (1 + \frac{T-1773}{10000})$    | [1,2]      |
| Al <sub>2</sub> O <sub>3</sub> | $28.3 \times (1 + \frac{T-1773}{10000})$    | [1,2]      |
| MgO                            | $16.1 \times (1 + \frac{T-1773}{10000})$    | [2]        |
| B <sub>2</sub> O <sub>3</sub>  | $45.8 \times (1 + \frac{T-1773}{10000})$    | [3]        |
| TiO <sub>2</sub>               | $19.65 \times (1 + \frac{T-1773}{10000})$   | [4]        |
| FeO                            | $15.8 \times (1 + \frac{T-1773}{10000})$    | [5]        |

**Table S2** The viscosity of slag obtained from CE under different temperature.

| Temperature (°C) | Slag viscosity (Pa•s) |
|------------------|-----------------------|
| 1300             | 3.259                 |
| 1350             | 1.552                 |
| 1400             | 0.823                 |
| 1450             | 0.479                 |
| 1500             | 0.3                   |
| 1550             | 0.2                   |
| 1600             | 0.14                  |

## References

1. Choi, J.Y.; Lee, H.G. Thermodynamic evaluation of the surface tension of molten CaO-SiO<sub>2</sub>-Al<sub>2</sub>O<sub>3</sub> ternary slag. *ISIJ Int.* **2002**, *42*, 221–228.
2. Liu, Y.; Lv, X.; Bai, C. *Prediction for the surface tension of FeO-TiO<sub>2</sub>-Ti<sub>2</sub>O<sub>3</sub>-X (SiO<sub>2</sub>, CaO, MgO) slag systems*. John Wiley & Sons, Ltd: Chichester, UK, 2015.
3. Nakamoto, M.; Tanaka, T.; Holappa, L.; Haemaeläinen, M.; Surface tension evaluation of molten silicates containing surface-active components (B<sub>2</sub>O<sub>3</sub>, CaF<sub>2</sub> or Na<sub>2</sub>O). *ISIJ Int.* **2007**, *47*, 211–216.
4. Nakamoto, M.; Kiyose, A.; Tanaka, T. Evaluation of the surface tension of ternary silicate melts containing Al<sub>2</sub>O<sub>3</sub>, CaO, FeO, MgO or MnO. *ISIJ Int.* **2007**, *47*, 38–43.
5. Heikkinen, E.P.; Riipi, J.; Fabritius, T. Computational modelling of oxide surface tensions in secondary metallurgy. *Steel Res. Int.* **2010**, *81*, 959–964.
